# Supplementary material for: A Machine Learning Framework Based on Extreme Gradient Boosting to Predict the Occurrence and Development of Infectious Diseases in Laying Hen Farms, Taking H9N2 as an Example
Source: MDPI journal article supplement (doi:10.3390/ani13091494), 2023-04-27
Supplement: s1 [file s1]

## Codes S1: Python codes

Take “laying rate and mortality of Day 0 as input, H9N2 status+0 as output” as an example, the Python codes are:

```
# Import packages

import pandas as pd
import numpy as np
import os
from matplotlib import pyplot as plt


from sklearn.model_selection import train_test_split
from sklearn.ensemble import RandomForestRegressor, RandomForestClassifier
from sklearn.neural_network import MLPRegressor, MLPClassifier
from sklearn.linear_model import LinearRegression, LogisticRegression
from sklearn.svm import SVR
import xgboost as xgb


from scipy.stats import pearsonr
from sklearn.metrics import accuracy_score, explained_variance_score,
mean_squared_error, recall_score
from sklearn.model_selection import GridSearchCV
import warnings
warnings.filterwarnings("ignore")


root_folder = os.getcwd()
raw_data = pd.read_csv(r'-4~0.csv', encoding="ISO-8859-1")


X_raw = raw_data[['lay_0', 'death_0']]
X_raw
```

```
y_raw= raw_data['illness0']
```

```
X = X_raw[0:72]
```

```
X_test = X_raw[73:112]
```

```
y = y_raw[0:72]
```

```
y_test = y_raw[73:112]
```

```
param_test1 = {
```

```
    'n_estimators':list(range(0,100,1)),
```

```
#    'max_depth':list(range(1,15,1)),
```

```
#    'min_child_weight':list(range(1,15,1))
```

```
}
```

```
gsearch1 = GridSearchCV(estimator = xgb.XGBClassifier( learning_rate =0.1,
```

```
n_estimators=13, max_depth=4,
```

```
    min_child_weight=1, gamma=0, subsample=0.8, colsample_bytree=0.8,
```

```
    objective= 'binary:logistic', nthread=4, scale_pos_weight=1, seed=27),
```

```
    param_grid = param_test1, scoring='accuracy', cv=5)
```

```
gsearch1=gsearch1.fit(X,y)
```

```
gsearch1.best_params_, gsearch1.best_score_
```

```
param_test2 = {
```

```
#    'n_estimators':list(range(0,100,1)),
```

```
    'max_depth':list(range(1,15,1)),
```

```
    'min_child_weight':list(range(1,15,1))
```

```
}
```

```
gsearch1 = GridSearchCV(estimator = xgb.XGBClassifier( learning_rate =0.1,
```

```
n_estimators=72, max_depth=4,
```

```
    min_child_weight=1, gamma=0, subsample=0.8, colsample_bytree=0.8,
```

```
    objective= 'binary:logistic', nthread=4, scale_pos_weight=1, seed=27),
```

```
    param_grid = param_test2, scoring='accuracy', cv=5)
```

```

gsearch1=gsearch1.fit(X,y)
gsearch1.best_params_, gsearch1.best_score_

param_test3 = {
#  'n_estimators':list(range(0,100,1)),
#  'max_depth':list(range(1,15,1)),
#  'min_child_weight':list(range(1,15,1)),
    'gamma':[i/10.0 for i in range(0,10)]

}

gsearch1 = GridSearchCV(estimator = xgb.XGBClassifier( learning_rate =0.1,
n_estimators=72, max_depth=3,
    min_child_weight=1, gamma=0, subsample=0.8, colsample_bytree=0.8,
    objective= 'binary:logistic', nthread=4, scale_pos_weight=1, seed=27),
    param_grid = param_test3, scoring='accuracy', cv=5)
gsearch1=gsearch1.fit(X,y)
gsearch1.best_params_, gsearch1.best_score_

param_test4 = {
#  'n_estimators':list(range(0,100,1)),
#  'max_depth':list(range(1,15,1)),
#  'min_child_weight':list(range(1,15,1)),
#      'gamma':[i/10.0 for i in range(0,10)]
    'subsample':[i/100.0 for i in range(70,90,5)],
    'colsample_bytree':[i/100.0 for i in range(70,90,5)]
}

gsearch1 = GridSearchCV(estimator = xgb.XGBClassifier( learning_rate =0.1,
n_estimators=72, max_depth=3,
    min_child_weight=1, gamma=0, subsample=0.8, colsample_bytree=0.8,
    objective= 'binary:logistic', nthread=4, scale_pos_weight=1, seed=27),

```

```

param_grid = param_test4, scoring='accuracy', cv=5)
gsearch1=gsearch1.fit(X,y)
gsearch1.best_params_, gsearch1.best_score_

param_test5 = {
#  'n_estimators':list(range(0,100,1)),
#  'max_depth':list(range(1,15,1)),
#  'min_child_weight':list(range(1,15,1)),
#    'gamma':[i/10.0 for i in range(0,10)],
#    'subsample':[i/100.0 for i in range(70,90,5)],
#  'colsample_bytree':[i/100.0 for i in range(70,90,5)],
    'learning_rate':[0.001,0.01, 0.02, 0.1, 0.2]
}
gsearch1 = GridSearchCV(estimator = xgb.XGBClassifier( learning_rate =0.1,
n_estimators=72, max_depth=3,
min_child_weight=1, gamma=0.0, subsample=0.75, colsample_bytree=0.7,
objective= 'binary:logistic', nthread=4, scale_pos_weight=1, seed=27),
param_grid = param_test5, scoring='accuracy', cv=5)
gsearch1=gsearch1.fit(X,y)
gsearch1.best_params_, gsearch1.best_score_

model = xgb.XGBClassifier(binary = 'logistic',learning_rate =0.1, n_estimators=72,
max_depth=3,
min_child_weight=1, gamma=0, subsample=0.75, colsample_bytree=0.7,objective=
'binary:logistic')

model.fit(X,y)

y_pred = model.predict(X_test)

```

```

true = np.sum(y_pred == y_test )
print('The correct result is: ', true)
print('The wrong result is: ', y_test.shape[0]-true)

from sklearn.metrics import
accuracy_score,precision_score,recall_score,f1_score,cohen_kappa_score
print('The accuracy of the predicted data is :
{:.4}%'.format(accuracy_score(y_test,y_pred)*100))
print('The precision of the predicted data is: {:.4}%'.format(
precision_score(y_test,y_pred)*100))
print('The recall rate of the predicted data is: {:.4}%'.format(
recall_score(y_test,y_pred)*100))
# print("The F1 value of the predicted data is: ", f1score_train)
print('The F1 value of the predicted data is: ',
f1_score(y_test,y_pred))
print('The Cohen’s Kappa factor of the predicted data is: ',
cohen_kappa_score(y_test,y_pred))

from xgboost import plot_importance

plot_importance(model)

from sklearn.metrics import roc_curve
y_pred_proba = model.predict_proba(X_test)
fpr,tpr,thres = roc_curve(y_test,y_pred_proba[:,1])
import matplotlib.pyplot as plt
plt.plot(fpr,tpr)
plt.show()

from sklearn.metrics import precision_recall_curve
from sklearn import metrics

```

```
y_pred_prob=model.predict_proba(X_test)[:,1]
fpr, tpr, thresholds = metrics.roc_curve(y_test,y_pred_prob, pos_label=1)
roc_auc = metrics.auc(fpr, tpr)
plt.figure(figsize=(8,6))
plt.plot([0, 1], [0, 1], color='navy', lw=2, linestyle='--')
plt.plot(fpr, tpr, 'r',label='AUC = %0.2f'% roc_auc)
plt.legend(loc='lower right')
plt.xlim([0, 1.1])
plt.ylim([0, 1.1])
plt.xlabel('False Positive Rate')
plt.ylabel('True Positive Rate')
plt.title('Receiver operating characteristic example')
plt.show()
```

fpr

tpr
