# Supplementary material for: A Machine Learning Framework Based on Extreme Gradient Boosting to Predict the Occurrence and Development of Infectious Diseases in Laying Hen Farms, Taking H9N2 as an Example
Source: MDPI journal article supplement (doi:10.3390/ani13091494), 2023-04-27
Supplement: s1 [file s1]

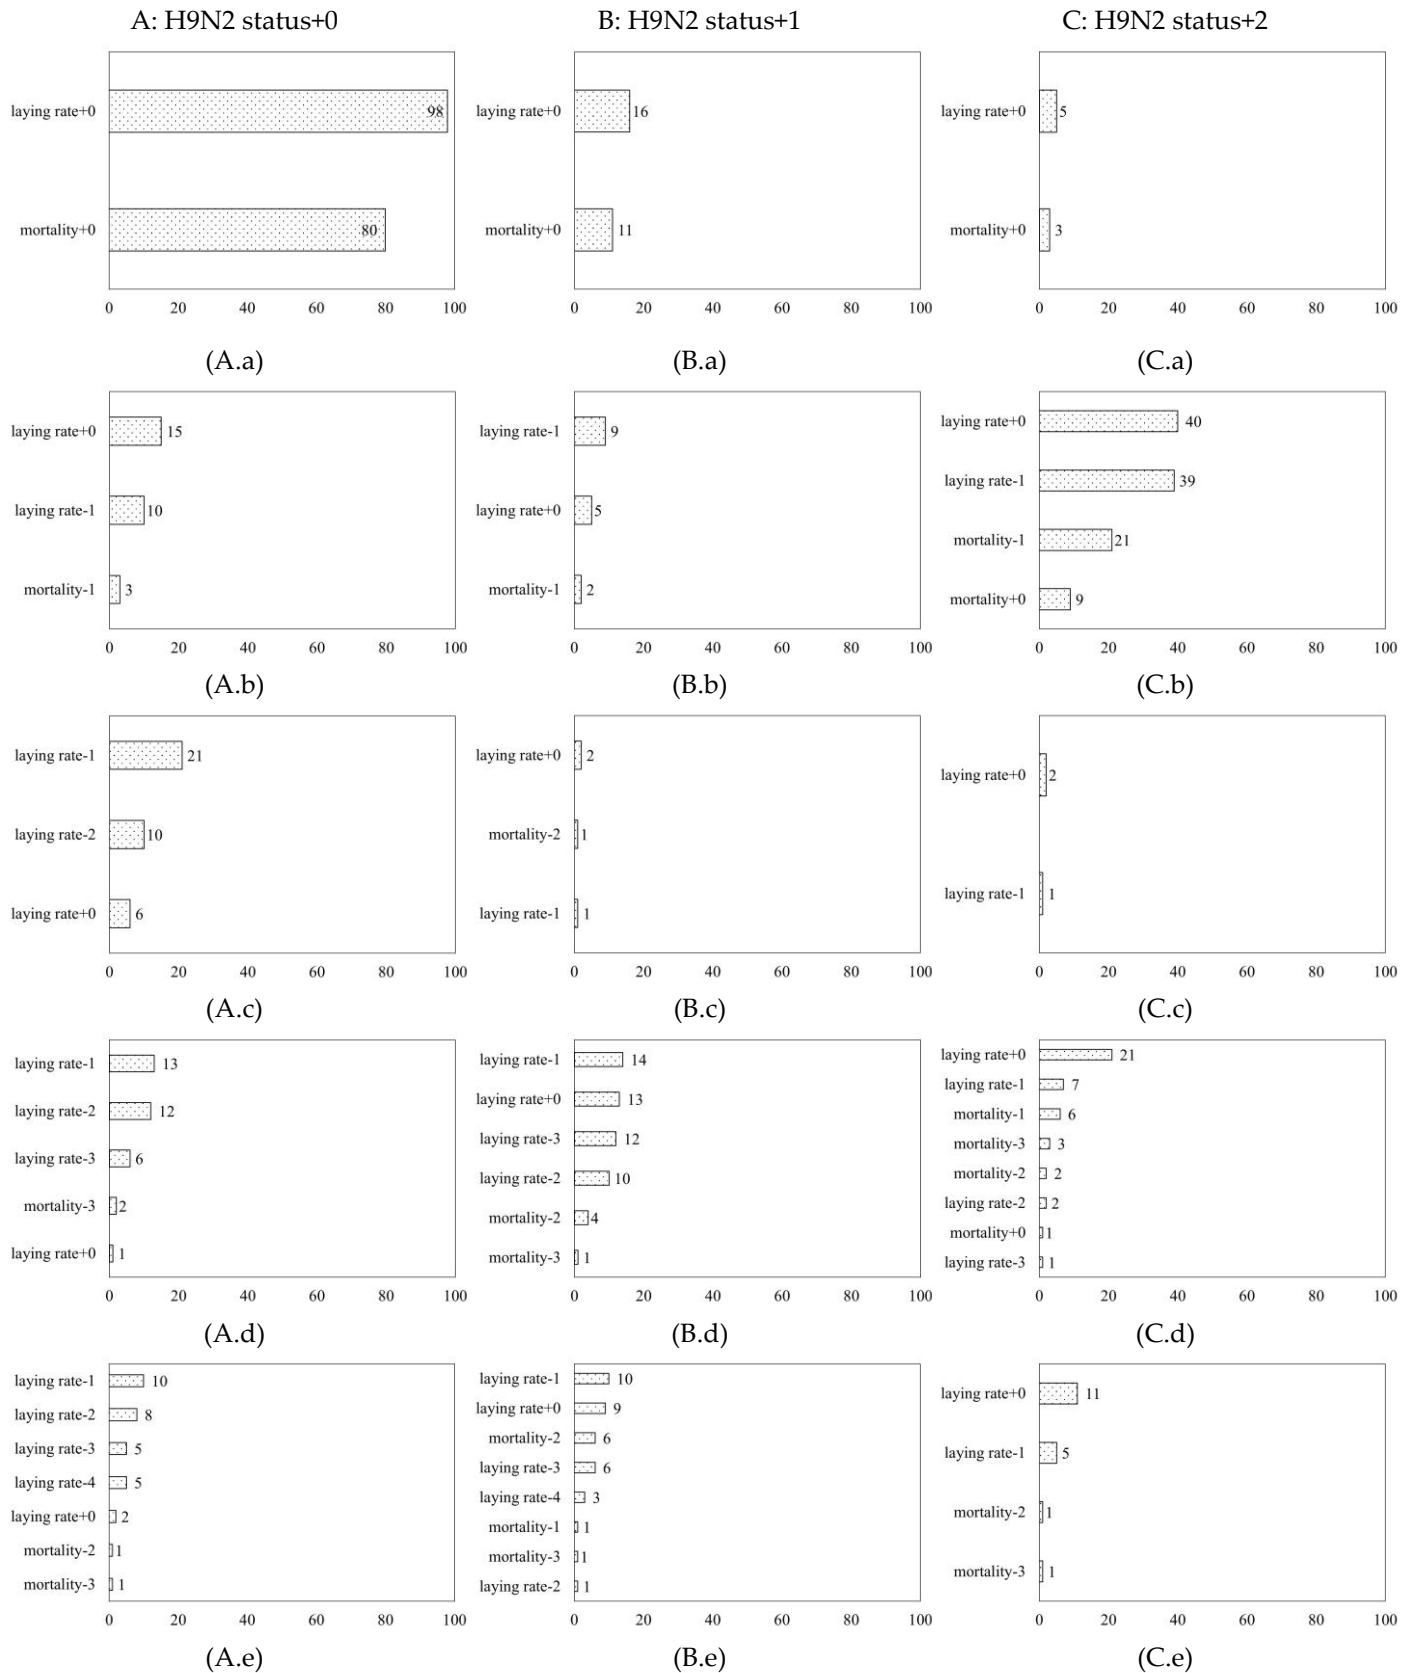

**Figure S1.** Feature importance for H9N2 status+0 (A), +1 (B), +2 (C) predictions in laying hen houses from the XGBoost classification models with time frames of day+0 (a), day-1 (b), day-2 (c), day-3 (d), and day-4 (e). +2 = future 2<sup>nd</sup> day, +1 = future 1<sup>st</sup> day, +0 = today, -1 = past 1 day, -2 = past 2 days, -3 = past 3 days, and -4 = past 4 days.
