# Supplementary material for: A Machine Learning Framework Based on Extreme Gradient Boosting to Predict the Occurrence and Development of Infectious Diseases in Laying Hen Farms, Taking H9N2 as an Example
Source: MDPI journal article supplement (doi:10.3390/ani13091494), 2023-04-27
Supplement: s1 [file s1]

**Datasets S1: Part of the collated datasets using in this study**

|    | laying rate _-4 | laying rate _-3 | laying rate _-2 | laying rate _-1 | laying rate _0 | mortality _-4 | mortality _-3 | mortality _-2 | mortality _-1 | mortality _0 | H9N2 status 0 | H9N2 status 1 | H9N2 status 2 |
|----|-----------------|-----------------|-----------------|-----------------|----------------|---------------|---------------|---------------|---------------|--------------|---------------|---------------|---------------|
| 1  | 97.1            | 97.1            | 96.3            | 95.5            | 95.5           | 0.02          | 0.03          | 0.03          | 0.03          | 0.02         | 0             | 0             | 0             |
| 2  | 97.1            | 96.3            | 95.5            | 95.5            | 95.6           | 0.03          | 0.03          | 0.03          | 0.02          | 0.04         | 0             | 0             | 0             |
| 3  | 96.3            | 95.5            | 95.5            | 95.6            | 95.6           | 0.03          | 0.03          | 0.02          | 0.04          | 0.02         | 0             | 0             | 0             |
| 4  | 95.5            | 95.5            | 95.6            | 95.6            | 96             | 0.03          | 0.02          | 0.04          | 0.02          | 0.04         | 0             | 0             | 0             |
| 5  | 95.5            | 95.6            | 95.6            | 96              | 96             | 0.02          | 0.04          | 0.02          | 0.04          | 0.05         | 0             | 0             | 0             |
| 6  | 95.6            | 95.6            | 96              | 96              | 94             | 0.04          | 0.02          | 0.04          | 0.05          | 0.05         | 0             | 0             | 0             |
| 7  | 95.6            | 96              | 96              | 94              | 92.4           | 0.02          | 0.04          | 0.05          | 0.05          | 0.06         | 0             | 0             | 0             |
| 8  | 96              | 96              | 94              | 92.4            | 91             | 0.04          | 0.05          | 0.05          | 0.06          | 0.08         | 0             | 0             | 1             |
| 9  | 96              | 94              | 92.4            | 91              | 90.5           | 0.05          | 0.05          | 0.06          | 0.08          | 0.1          | 0             | 1             | 1             |
| 10 | 94              | 92.4            | 91              | 90.5            | 89.2           | 0.05          | 0.06          | 0.08          | 0.1           | 0.05         | 1             | 1             | 1             |
| 11 | 92.4            | 91              | 90.5            | 89.2            | 87.6           | 0.06          | 0.08          | 0.1           | 0.05          | 0.05         | 1             | 1             | 1             |
| 12 | 89.2            | 87.6            | 87.4            | 88.3            | 89             | 0.05          | 0.05          | 0.05          | 0.05          | 0.03         | 1             | 1             | 1             |
| 13 | 87.6            | 87.4            | 88.3            | 89              | 89.7           | 0.05          | 0.05          | 0.05          | 0.03          | 0.05         | 1             | 1             | 1             |
| 14 | 87.4            | 88.3            | 89              | 89.7            | 90.3           | 0.05          | 0.05          | 0.03          | 0.05          | 0.03         | 1             | 1             | 1             |
| 15 | 89.7            | 90.3            | 91.3            | 92.1            | 92.3           | 0.05          | 0.03          | 0.03          | 0.03          | 0.03         | 1             | 1             | 1             |
| 16 | 90.3            | 91.3            | 92.1            | 92.3            | 92.8           | 0.03          | 0.03          | 0.03          | 0.03          | 0.03         | 1             | 1             | 0             |
| 17 | 91.3            | 92.1            | 92.3            | 92.8            | 93.2           | 0.03          | 0.03          | 0.03          | 0.03          | 0.02         | 1             | 0             | 0             |
| 18 | 92.1            | 92.3            | 92.8            | 93.2            | 92.4           | 0.03          | 0.03          | 0.03          | 0.02          | 0.04         | 0             | 0             | 0             |
| 19 | 94.34           | 94.3            | 94.26           | 94.29           | 94.15          | 0.03          | 0.04          | 0.03          | 0.03          | 0.03         | 0             | 0             | 0             |
| 20 | 94.3            | 94.26           | 94.29           | 94.15           | 94.15          | 0.04          | 0.03          | 0.03          | 0.03          | 0.04         | 0             | 0             | 0             |

For the result to be practical for field scientists and researchers without bioinformatic/machine learning skills, we take "part of the collated datasets using for prediction model development in this study" as an example to help readers easily understand how to prepare the datasets directly used to input the model.
